# Supplementary material for: Phosphorylation Mimetic of Myosin Regulatory Light Chain Mitigates Cardiomyopathy-induced Myofilament Impairment in Mouse Models of RCM and DCM
Source: Preprints.org preprint supplement (doi:10.20944/preprints202306.0357.v1), 2023-06-05
Supplement: Supplementary file 1 [file supplementary]

# Supplementary Materials

## Supplementary Figures

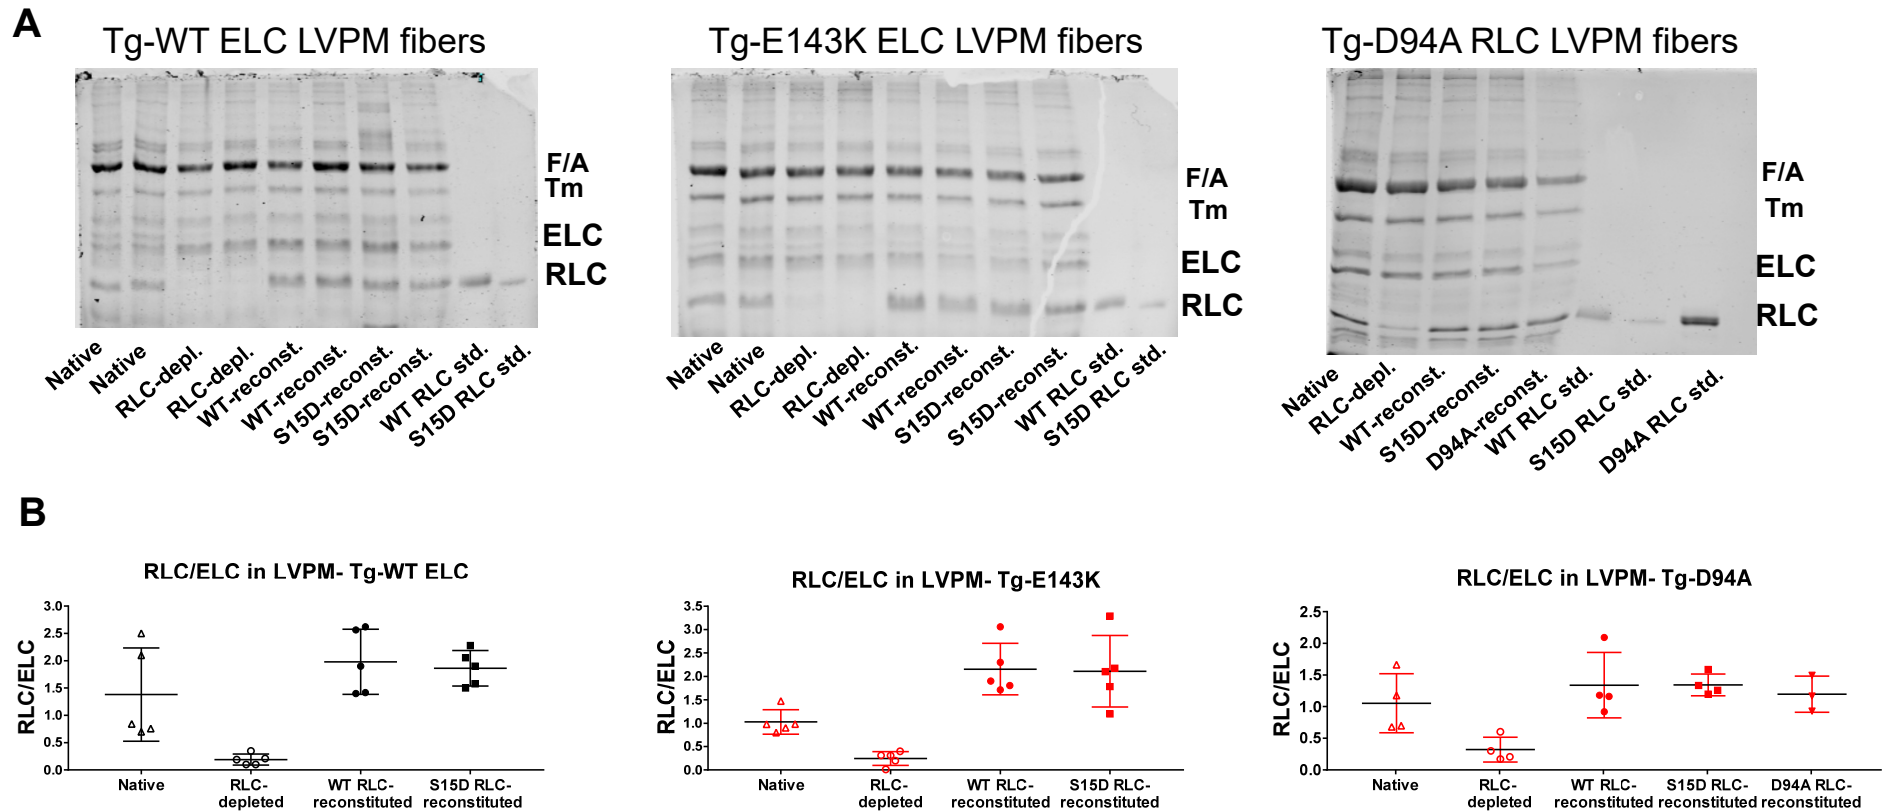

**Figure S1. Representative SDS-PAGE of RLC-depleted and mutant-reconstituted LVPM preparations from Tg-WT ELC , Tg-E143K ELC, and Tg-D94A RLC mice.** Depletion and reconstitution experiments in Tg-WT ELC, Tg-E143K ELC, and Tg-D94A RLC LVPM fibers are shown in (A), while quantification is presented in (B). LVPM fibers were CDTA/Triton-depleted of endogenous RLC and reconstituted with recombinant WT-RLC, S15D-RLC, and D94A-RLC proteins. To measure the efficiency of the depletion/reconstitution 3-5 LVPM fibers from mouse ventricles were subjected to depletion. The band intensity of ELC and RLC were assessed and the RLC/ELC  $\pm$ SD were calculated:  $1.38 \pm 0.85$  for Tg-ELC native,  $1.06 \pm 0.22$  for Tg-E143K ELC native, and  $1.05 \pm 0.47$  for Tg-D94A RLC native. RLC/ELC  $\pm$ SD for depleted fibers were  $0.20 \pm 0.10$  for Tg-ELC,  $0.24 \pm 0.15$  for Tg-E143K,  $0.32 \pm 0.20$  for Tg-D94A. RLC/ELC  $\pm$ SD for reconstituted fibers were  $1.92 \pm 0.45$  for Tg-ELC,  $2.13 \pm 0.62$  for Tg-E143K, and  $1.30 \pm 0.33$  % for Tg-D94A.
